# Supplementary material
Source: MDPI journal article supplement (https://www.mdpi.com/2673-6004/3/1/3)
Supplement: s1 [file s1]

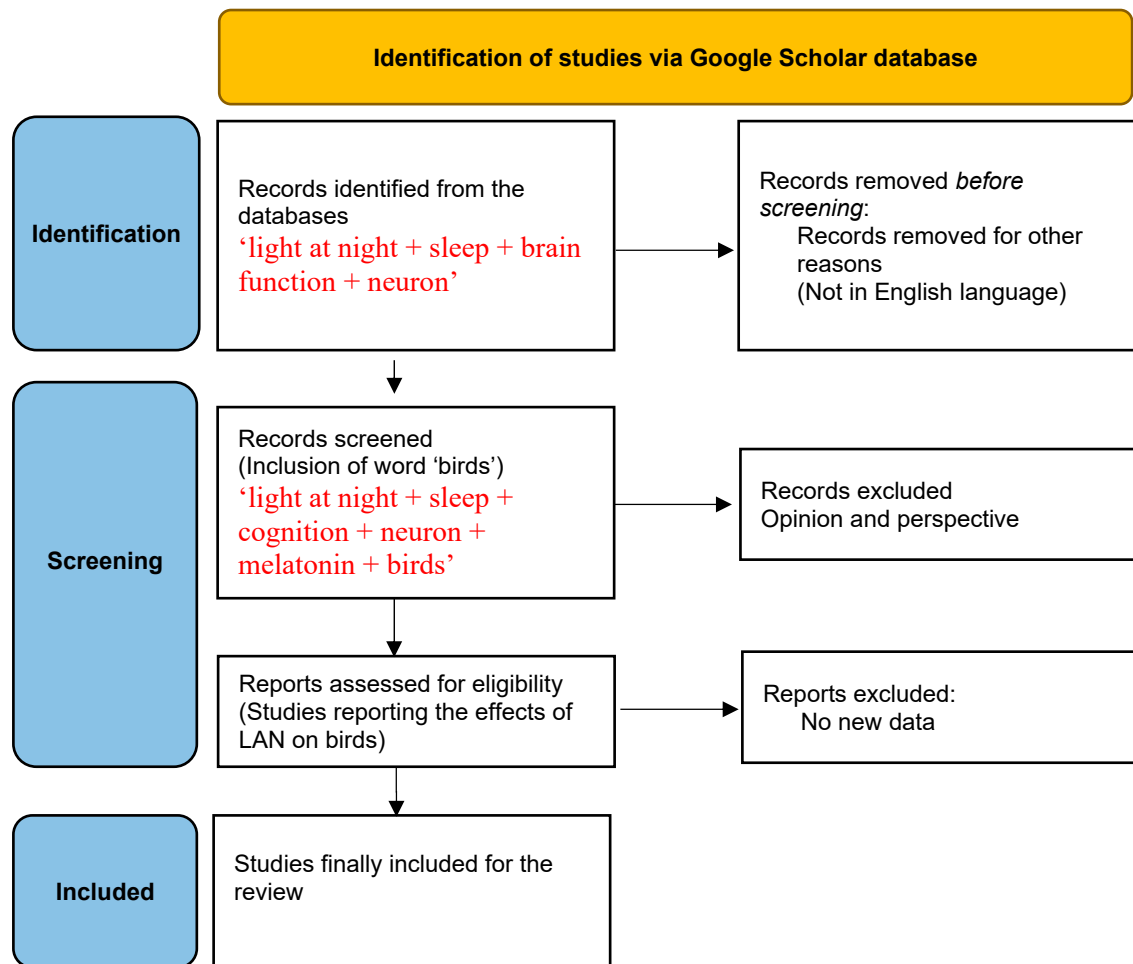

**Supplementary figure S1:** Flow diagram for identification, screening and inclusion of articles and reports from Google Scholar search for the review.
