# Supplementary material
Source: MDPI journal article supplement (https://www.mdpi.com/2673-6004/3/1/3)
Supplement: s1 [file s1]

Archive with 1 entries (1 files):
- birds-1475243-supplementary.pdf
